# Supplementary material for: The first report on phosphonate-based homopolymers combining both chelating and thermosensitive properties of gadolinium: synthesis and evaluation
Source: Royal Society of Chemistry journal article supplement (doi:10.1039/c5py00785b), 2015-01-01
Supplement: c5py00785b1.pdf [file c5py00785b1.pdf]

## Supplementary Information

### **First report on phosphonate-based homopolymer combining both gadolinium chelating and thermosensitive properties: synthesis and evaluation**

Donatien Gomes Rodrigues,<sup>a-d</sup> Nicolas Dacheux,<sup>b</sup> Stéphane Pellet-Rostaing,<sup>c</sup> Catherine Faur,<sup>d</sup> Denis Bouyer,<sup>d</sup> and Sophie Monge<sup>\*,a</sup>

<sup>a</sup> Institut Charles Gerhardt Montpellier UMR5253 CNRS-UM-ENSCM - Equipe Ingénierie et Architectures Macromoléculaires, Université de Montpellier, cc1702, Place Eugène Bataillon 34095 Montpellier Cedex 5, France.

<sup>b</sup> Institut de Chimie Séparative de Marcoule UMR 5257 CEA-CNRS-UM-ENSCM - Laboratoire des Interfaces des Matériaux en Evolution, Site de Marcoule, Bâtiment 426, 30207 Bagnols sur Cèze Cedex, France.

<sup>c</sup> Institut de Chimie Séparative de Marcoule UMR 5257 CEA-CNRS-UM-ENSCM - Laboratoire du Tri-ionique par des Systèmes Moléculaires auto-assemblés, Site de Marcoule, Bâtiment 426, 30207 Bagnols sur Cèze Cedex, France.

<sup>d</sup> Institut Européen des Membranes UMR 5635 CNRS-ENSCM-UM - Département Génie des Procédés Membranaires, Université de Montpellier, cc047, Place Eugène Bataillon, 34095 Montpellier, Cedex 5, France.

## CHARACTERIZATION BY $^1\text{H}$ NMR OF THE MONOMER SYNTHESIS

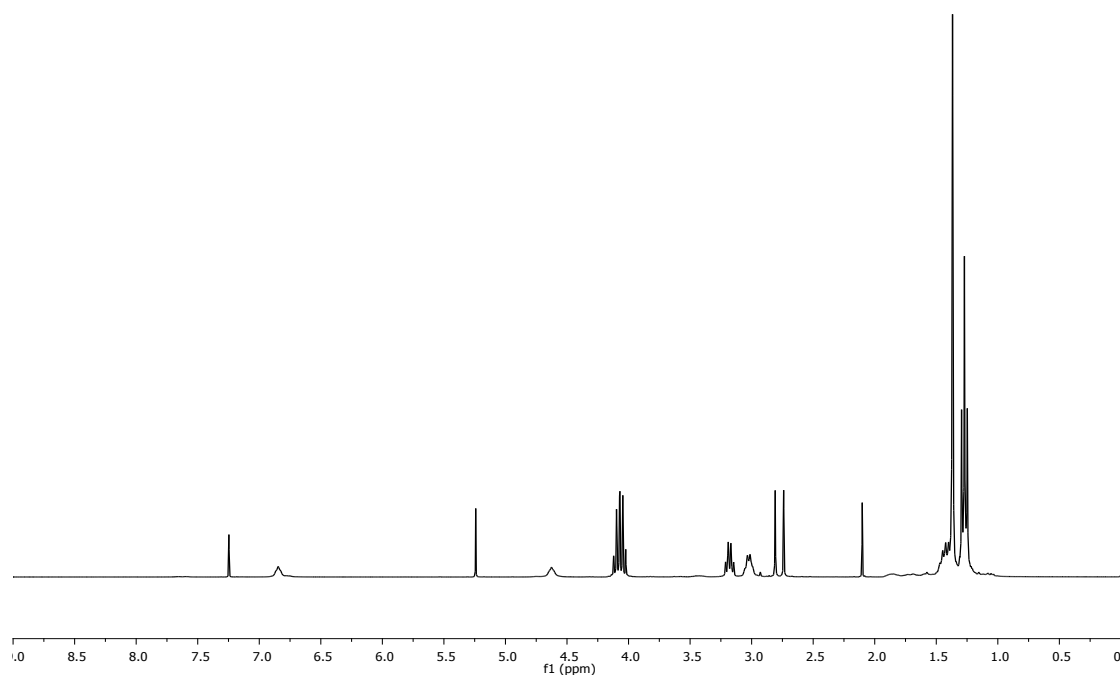

**Fig. S1**  $^1\text{H}$  NMR spectrum in deuterated chloroform of diethyl-6-(tert-butoxycarbonylamino)hexyl carbamoylmethylphosphonate (**2**).

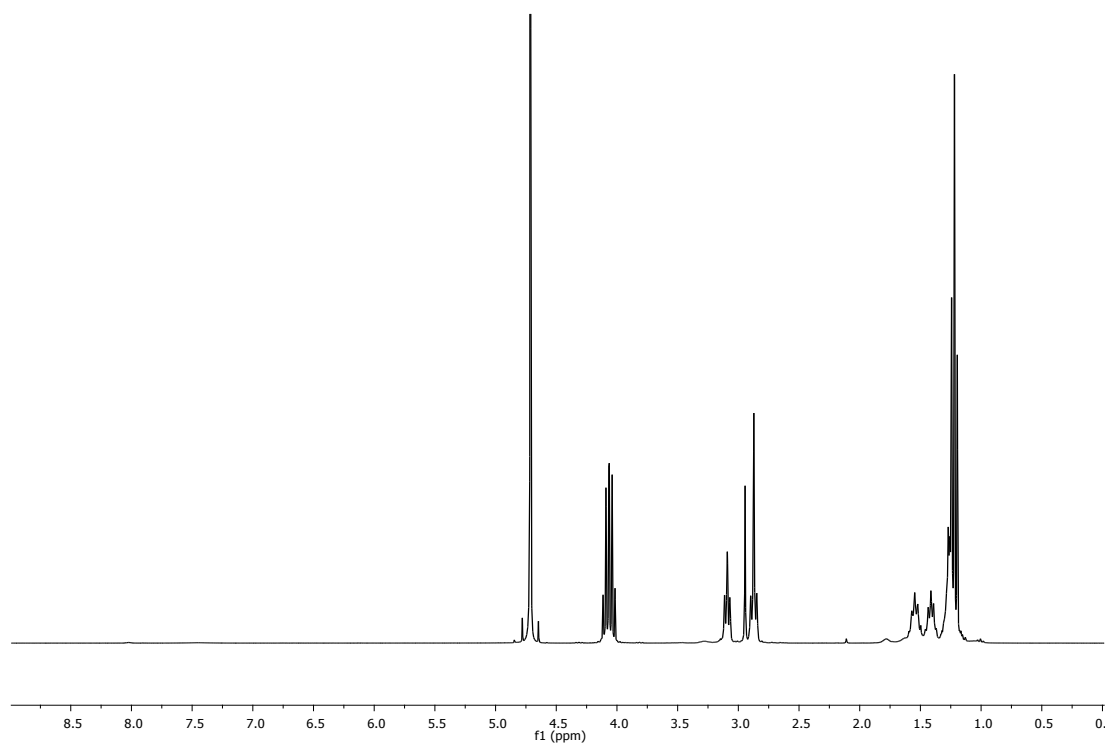

**Fig. S2**  $^1\text{H}$  NMR spectrum in deuterated water of hexyl-6-(diethylcarbamoylphosphonate)-1-amonium trifluoroacetate salt (**3**).

## EVALUATION OF THE THERMOSENSITIVITY PROPERTY OF P(CPAAm6C)

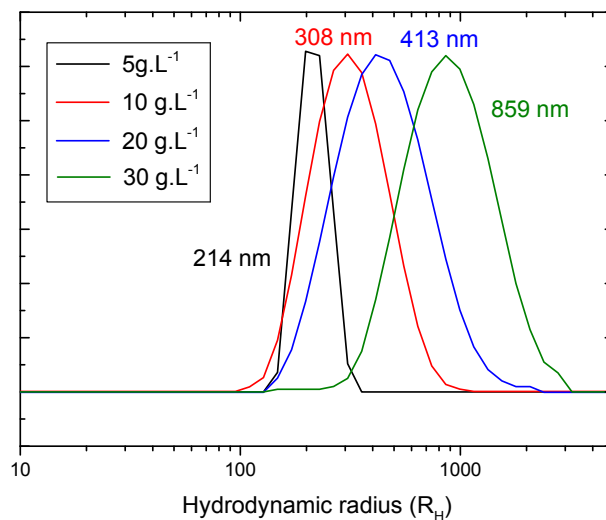

**Fig. S3** Hydrodynamic radii ( $R_H$ ) distributions of P(CPAAm6C) solutions 5 °C above the cloud point at different polymer concentrations (5, 10, 20, and 30 g.L<sup>-1</sup>).

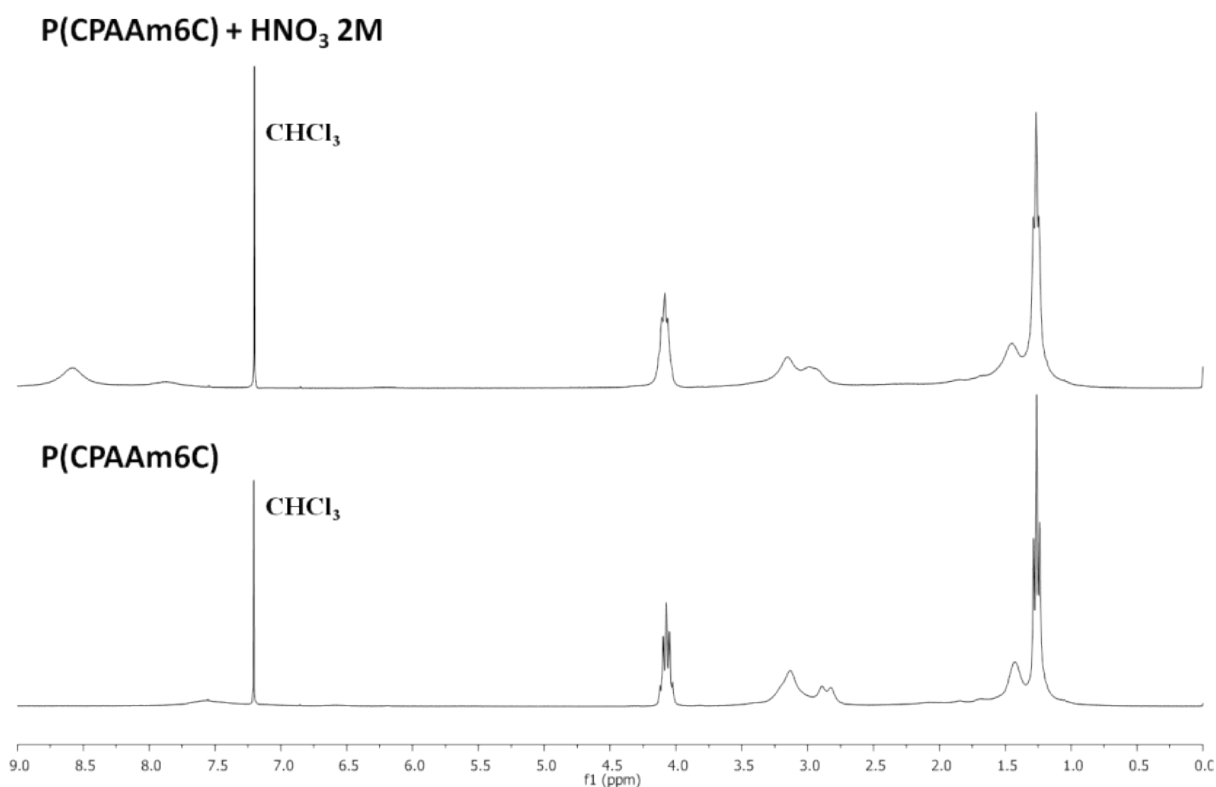

**Fig. S4** <sup>1</sup>H NMR spectrum in deuterated chloroform of P(CPAAm6C) before (below) and after (above) being mixed with nitric acid.

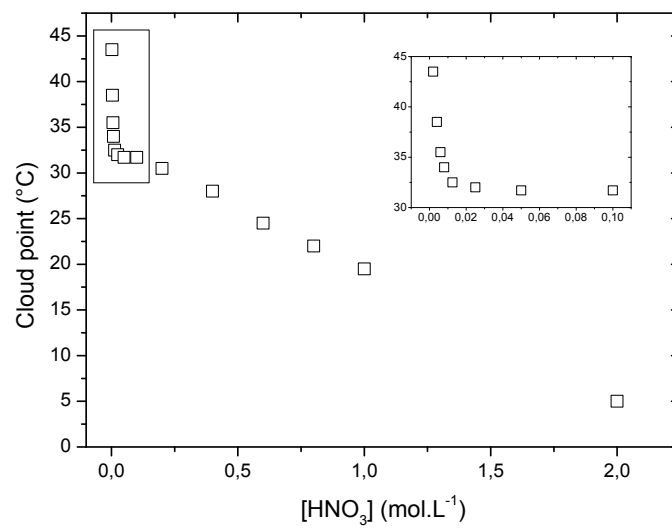

**Fig. S5** Cloud point of P(CPAAm6C) as a function of the nitric acid concentration. The inset represents a zoom at the acid nitric concentration ranging from 0 to 0.1 mol.L<sup>-1</sup> [P(CPAAm6C)] = 5 g.L<sup>-1</sup>.
